# Supplementary material for: Overexpression of RAB34 associates with tumor aggressiveness and immune infiltration in glioma
Source: Oxford University Press journal article supplement (doi:10.1042/bsr20212624), 2022-10-01
Supplement: bsr-2021-2624_supp.pdf [file bsr-2021-2624_supp.pdf]

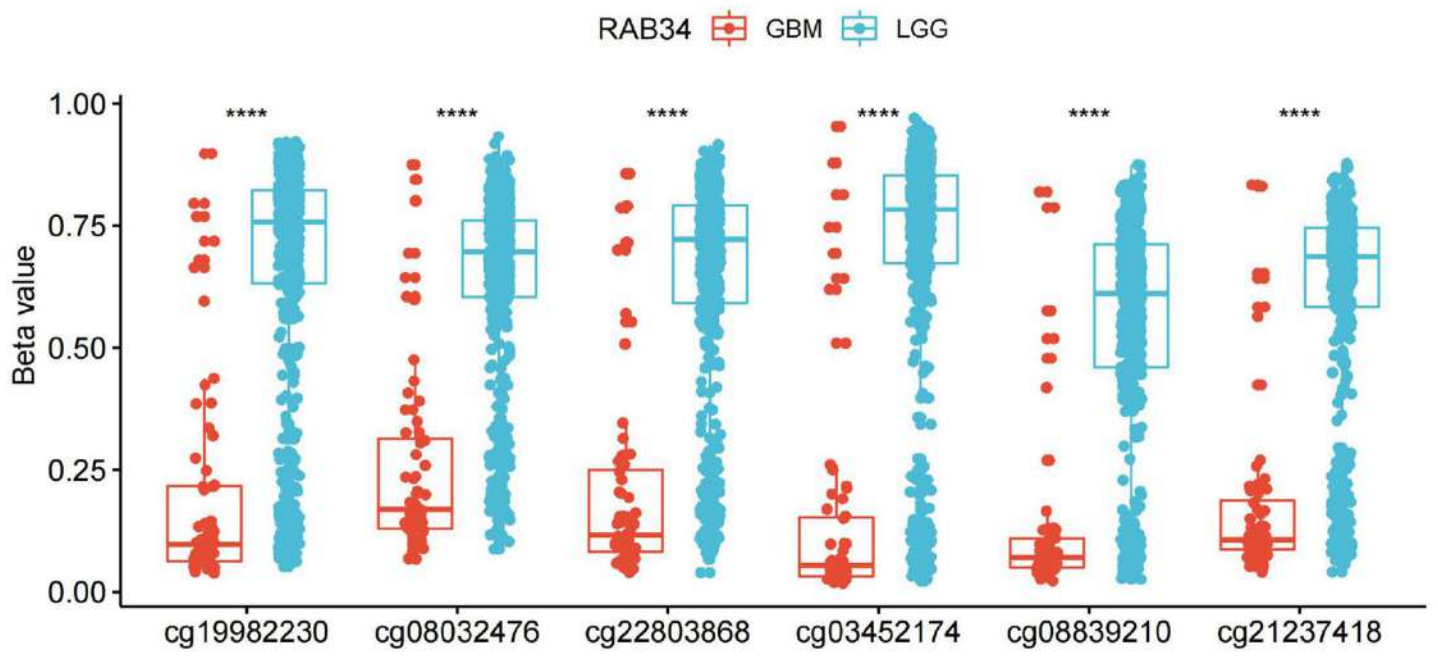

**Figure S1.** The DNA methylation beta values at six CpG sites (cg19982230, cg08032476, cg22803868, cg03452174, cg08839210, and cg21237418) were markedly higher in LGG (lower grade glioma) than that in GBM in TCGA dataset. \*\*\*\*  $P < 0.0001$ .

(A)

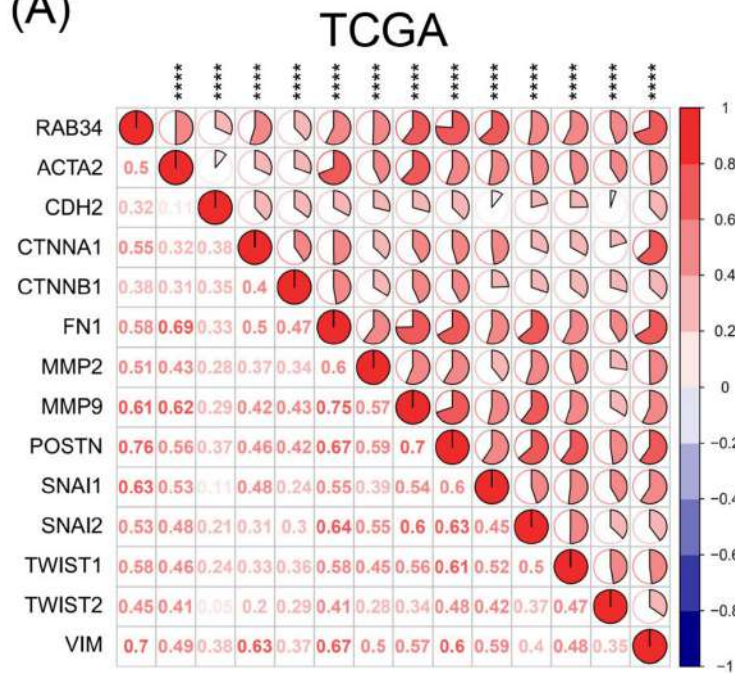

(B)

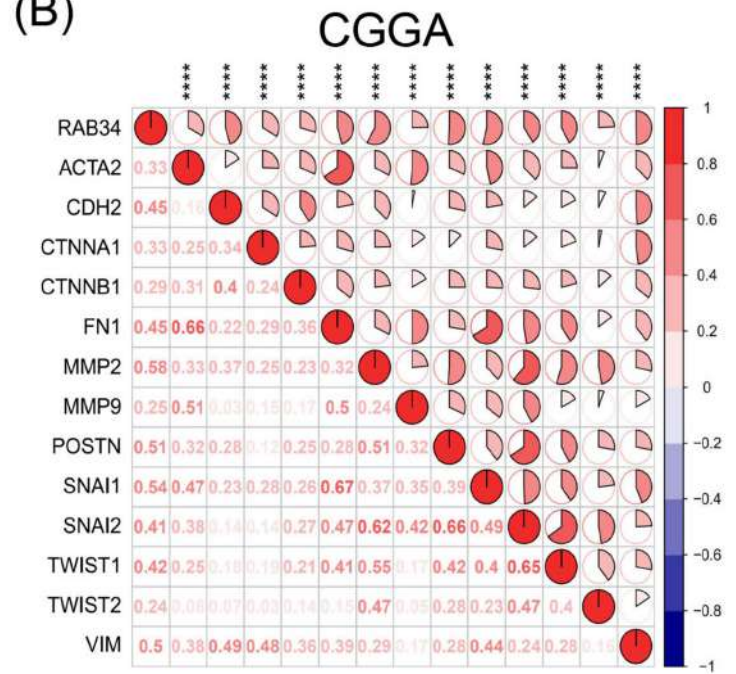

**Figure S2.** The relationship between RAB34 expression and common EMT biomarkers. **A, B** RAB34 expression was dramatically linked to common EMT biomarkers based on TCGA and CGGA datasets. \*\*\*\*  $P < 0.0001$ .
